# Supplementary material for: In situ formation of ultrahigh molecular weight polymers in highly concentrated electrolytes and their physicochemical properties
Source: Royal Society of Chemistry journal article supplement (doi:10.1039/d4sm01248h), 2025-01-01
Supplement: d4sm01248h1.pdf [file d4sm01248h1.pdf]

## **Electronic Supplementary Information (ESI)**

### ***In situ* formation of ultrahigh molecular weight polymers in highly concentrated electrolytes and their physicochemical properties**

Yuji Kamiyama,<sup>a</sup> Takeshi Ueki,<sup>a,b</sup> Ryota Tamate<sup>a,c\*</sup>

<sup>a</sup>Research Center for Macromolecules & Biomaterials, National Institute for Materials Science, 1-2-1 Sengen, Tsukuba 305-0047, Japan

<sup>b</sup>Graduate School of Life Science, Hokkaido University, Kita 10, Nishi 8, Kita-ku, Sapporo 060-0810, Japan

<sup>c</sup>PRESTO, JST, 7 Gobancho, Chiyoda-ku, Tokyo 102-0076, Japan

E-mail: [TAMATE.Ryota@nims.go.jp](mailto:TAMATE.Ryota@nims.go.jp)

**Table S1.** Polymerisation conditions and characterisation of the polymers synthesised in

this study.

| solvent           | salt  | salt conc. (M)    | [M]/[I] ratio <sup>a</sup> | $M_n$ (kDa) <sup>b</sup> | $M_w$ (kDa) <sup>b</sup> | PDI <sup>b</sup> | monomer conversion (%) <sup>c</sup> |       |
|-------------------|-------|-------------------|----------------------------|--------------------------|--------------------------|------------------|-------------------------------------|-------|
| TEGDME            | non.  | 0                 | 200                        | 41                       | 56                       | 1.36             | 99.7                                |       |
|                   |       |                   | 1000                       | 91                       | 159                      | 1.76             | 97.4                                |       |
|                   |       |                   | 2500                       | 220                      | 490                      | 2.22             | 95.0                                |       |
|                   |       |                   | 5000                       | 300                      | 778                      | 2.59             | 88.8                                |       |
|                   |       |                   | 10000                      | 454                      | 1045                     | 2.30             | 80.4                                |       |
|                   | LiFSI | 1.0               | 1.0                        | 200                      | 39                       | 52               | 1.31                                | 99.7  |
|                   |       |                   |                            | 1000                     | 172                      | 334              | 1.94                                | 99.8  |
|                   |       |                   |                            | 2500                     | 283                      | 575              | 2.04                                | 99.8  |
|                   |       |                   |                            | 5000                     | 429                      | 848              | 1.98                                | 99.3  |
|                   |       |                   |                            | 10000                    | 534                      | 1356             | 2.54                                | 99.0  |
|                   |       | 1.5               | 10000                      | 639                      | 1193                     | 1.87             | 97.0                                |       |
|                   |       | 2.0               | 10000                      | 1077                     | 1806                     | 1.68             | 96.0                                |       |
|                   |       | 2.5               | 10000                      | 1188                     | 1908                     | 1.61             | 95.4                                |       |
|                   |       | 3.2               | 3.2                        | 200                      | 93                       | 191              | 2.05                                | 99.9  |
|                   |       |                   |                            | 1000                     | 338                      | 713              | 2.11                                | 99.8  |
|                   |       |                   |                            | 2500                     | 508                      | 1003             | 1.97                                | 99.6  |
|                   |       |                   |                            | 5000                     | 919                      | 1642             | 1.79                                | 99.2  |
|                   |       |                   |                            | 10000                    | 1225                     | 2002             | 1.63                                | 99.9  |
|                   |       | LiTFSI            | 2.8                        | 10000                    | 1068                     | 1734             | 1.62                                | 99.4  |
|                   |       | LiBF <sub>4</sub> | 3.9                        | 10000                    | 1489                     | 2314             | 1.55                                | 99.9  |
| LiNO <sub>3</sub> | 4.0   | 10000             | 743                        | 1518                     | 2.04                     | 98.6             |                                     |       |
| DMC               | non.  | 0                 | 200                        | 33                       | 43                       | 1.31             | 97.9                                |       |
|                   |       |                   | 1000                       | 75                       | 148                      | 1.98             | 94.6                                |       |
|                   |       |                   | 2500                       | 156                      | 403                      | 2.58             | 82.9                                |       |
|                   |       |                   | 5000                       | 271                      | 893                      | 3.29             | 66.7                                |       |
|                   |       |                   | 10000                      | 369                      | 1265                     | 3.43             | 62.7                                |       |
|                   | LiFSI | 4.7               | 4.7                        | 200                      | 99                       | 182              | 1.84                                | 99.9  |
|                   |       |                   |                            | 1000                     | 365                      | 702              | 1.92                                | 99.6  |
|                   |       |                   |                            | 2500                     | 715                      | 1213             | 1.70                                | 99.5  |
|                   |       |                   |                            | 5000                     | 1103                     | 1672             | 1.52                                | 99.7  |
|                   |       |                   |                            | 10000                    | 1170                     | 2154             | 1.84                                | 99.8  |
|                   |       | 5.5               | 5.5                        | 200                      | 158                      | 329              | 2.08                                | 99.8  |
|                   |       |                   |                            | 1000                     | 571                      | 963              | 1.68                                | 100.0 |
|                   |       |                   |                            | 2500                     | 1216                     | 1749             | 1.44                                | 99.7  |
|                   |       |                   |                            | 5000                     | 1624                     | 2298             | 1.41                                | 99.9  |
|                   |       |                   |                            | 10000                    | 1944                     | 2545             | 1.31                                | 98.8  |
| FEC               | 4.2   | 4.2               | 200                        | 169                      | 320                      | 1.89             | 99.8                                |       |
|                   |       |                   | 1000                       | 651                      | 1121                     | 1.72             | 99.9                                |       |
|                   |       |                   | 2500                       | 1112                     | 1606                     | 1.44             | 99.8                                |       |

|  |  |  |       |      |      |      |      |
|--|--|--|-------|------|------|------|------|
|  |  |  | 5000  | 1423 | 1902 | 1.34 | 99.8 |
|  |  |  | 10000 | 1753 | 2509 | 1.43 | 99.8 |

<sup>a</sup>molar ratio of the MMA monomer to the V-65 initiator. <sup>b</sup>measured via GPC. <sup>c</sup>determined from <sup>1</sup>H-NMR.

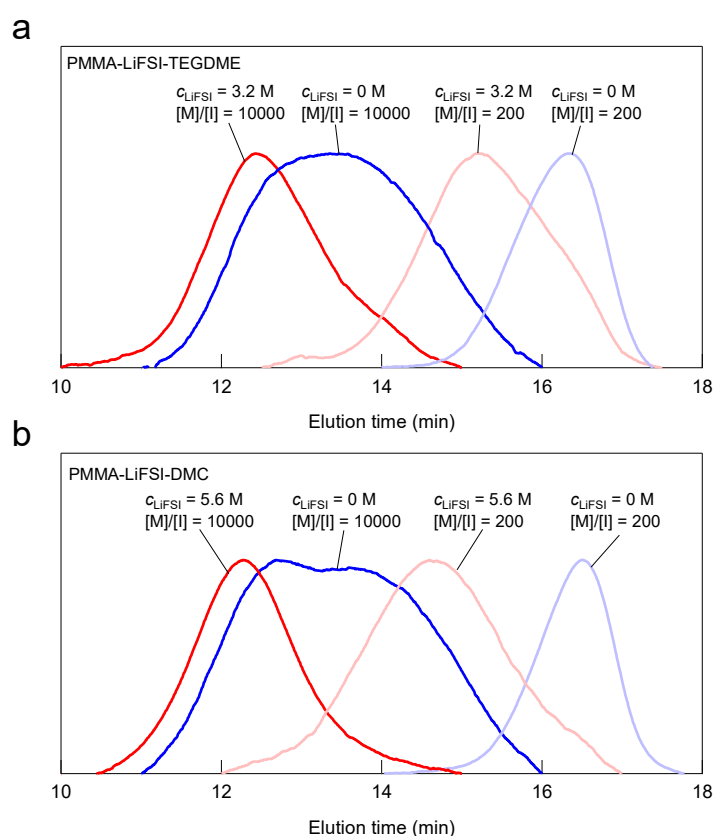

**Fig. S1.** GPC traces for (a) PMMA-LiFSI-TEGDME and (b) PMMA-LiFSI-DMC systems with different  $[\text{M}]/[\text{I}]$  ratios and lithium salt concentrations. At high  $[\text{M}]/[\text{I}]$  ratios and without the lithium salt, broad polydispersity was observed in both solvent systems (shown in blue); however, in the highly concentrated condition, a narrower unimodal peak was obtained (shown in red).

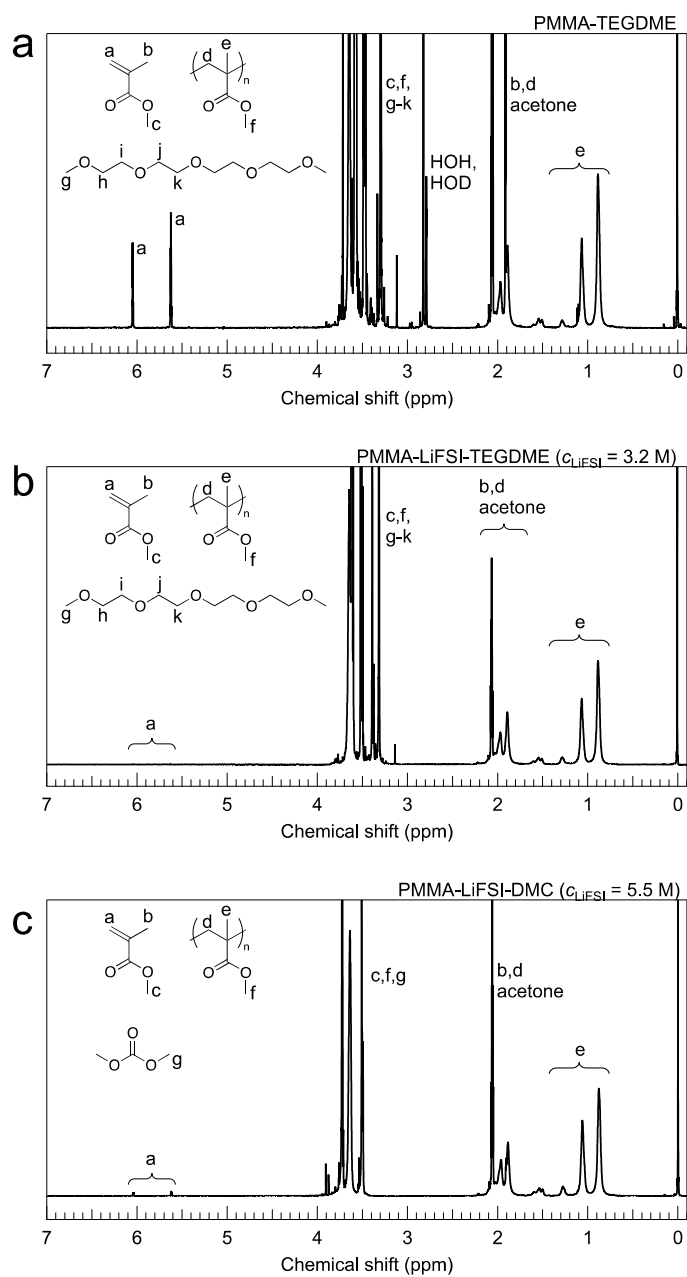

**Fig. S2.**  $^1\text{H}$  NMR spectra of the polymerisation products of MMA in (a) pure TEGDME, (b) a 3.2 M LiFSI-TEGDME solution, and (c) a 5.5 M LiFSI-DMC solution.

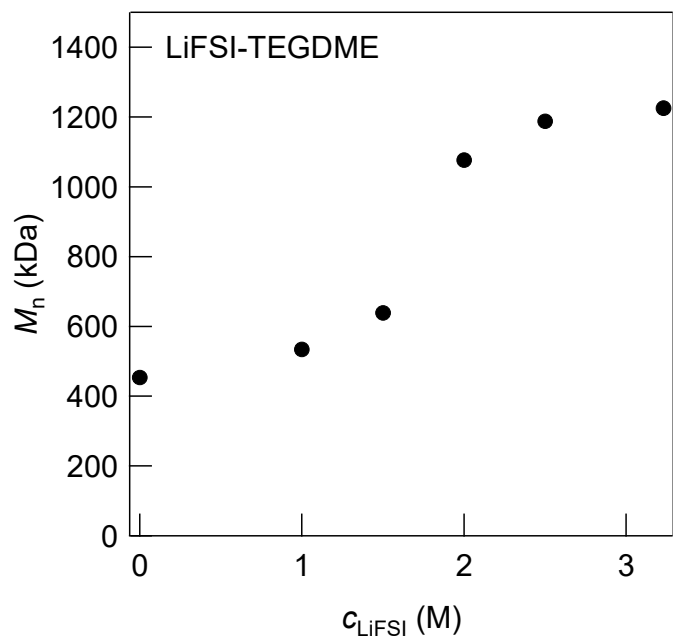

**Fig. S3.** Relationship between the  $M_n$  of PMMA and the concentration of lithium salt

( $c_{\text{LiFSI}}$ ) in the electrolyte. The  $[\text{M}]/[\text{I}]$  ratio was 10,000.

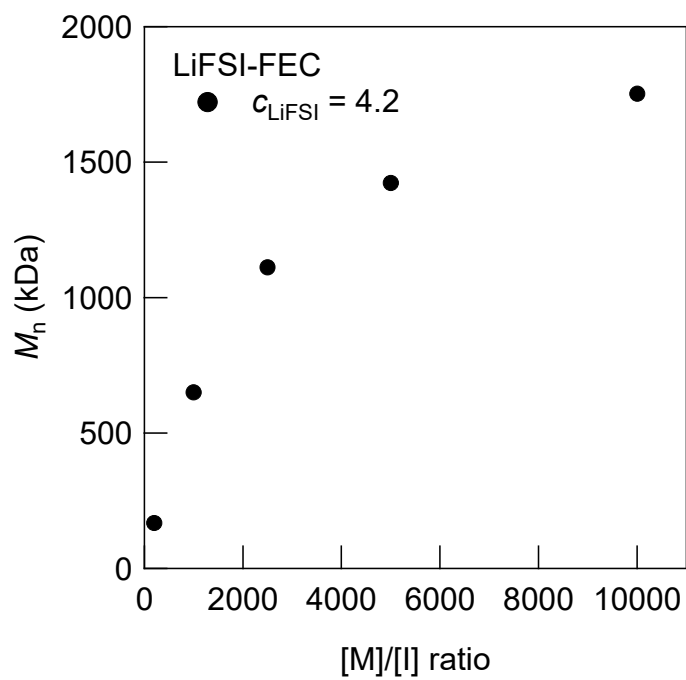

**Fig. S4.** Dependence of  $M_n$  on the  $[\text{M}]/[\text{I}]$  ratio for a 4.2 M LiFSI-FEC system.

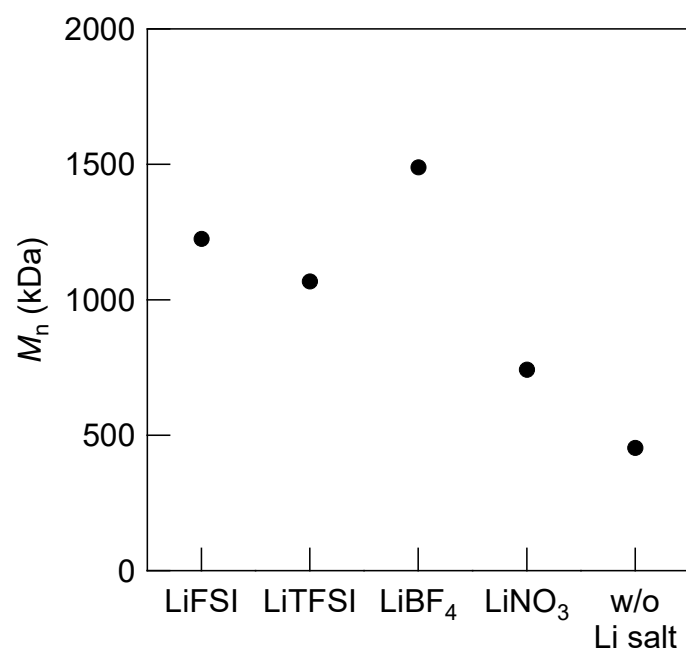

**Fig. S5.**  $M_n$  of PMMA obtained via polymerisation in pure TEGDME and equimolar mixtures of TEGDME and lithium salts with different counteranions.

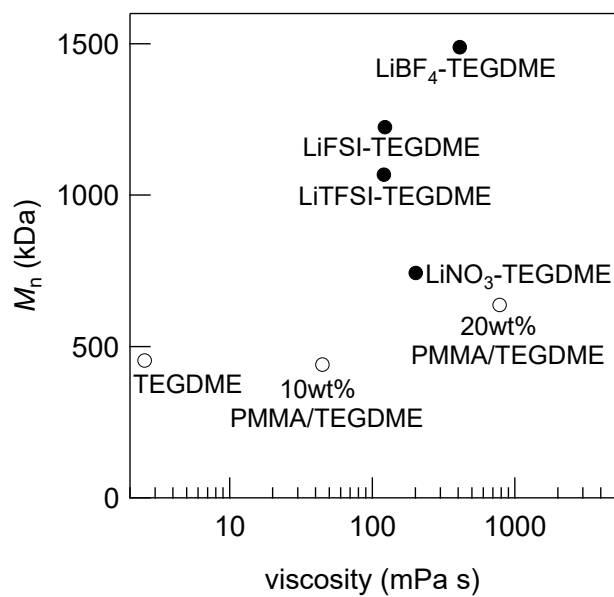

**Fig. S6.** The relationship between solvent viscosity and  $M_n$  for equimolar mixture systems composed of TEGDME and Li salts (closed circles), as well as viscosity-tuned non-ionic TEGDME systems (open circles). The viscosity of the non-ionic TEGDME systems was adjusted by dissolving commercial PMMA (120 kDa) at varying concentrations.

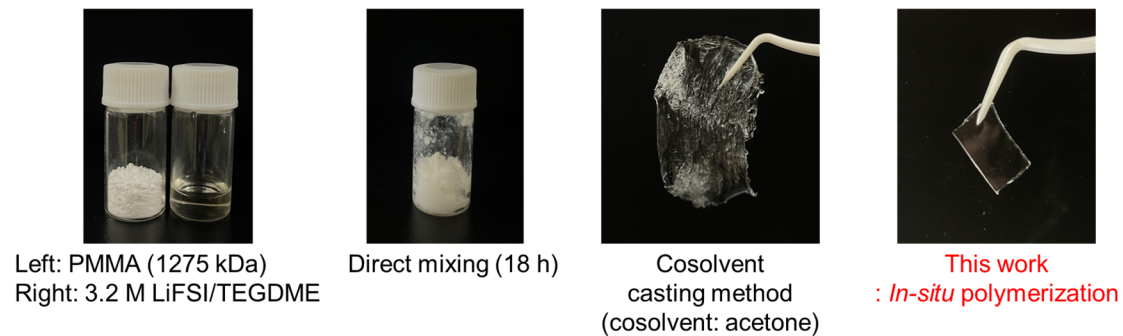

**Fig. S7.** Photographs of composites of ultrahigh molecular weight (UHMW) PMMA and a highly concentrated electrolyte (HCE) composed of an equimolar mixture of LiFSI and TEGDME ( $c_{\text{LiFSI}} = 3.2\text{M}$ ) prepared by different methods. UHMW polymers are difficult to mix directly with the HCE due to their extremely slow relaxation kinetics. In the cosolvent casting method, the slow diffusion of the UHMW polymer relative to the cosolvent evaporation rate results in heterogeneous polymer precipitation. Evaporation of primary solvent also poses a challenge, as many HCEs are not completely nonvolatile. Compared to these methods, *in-situ* polymerisation of UHMW PMMA in HCEs resulted in homogeneous and transparent physical gels.



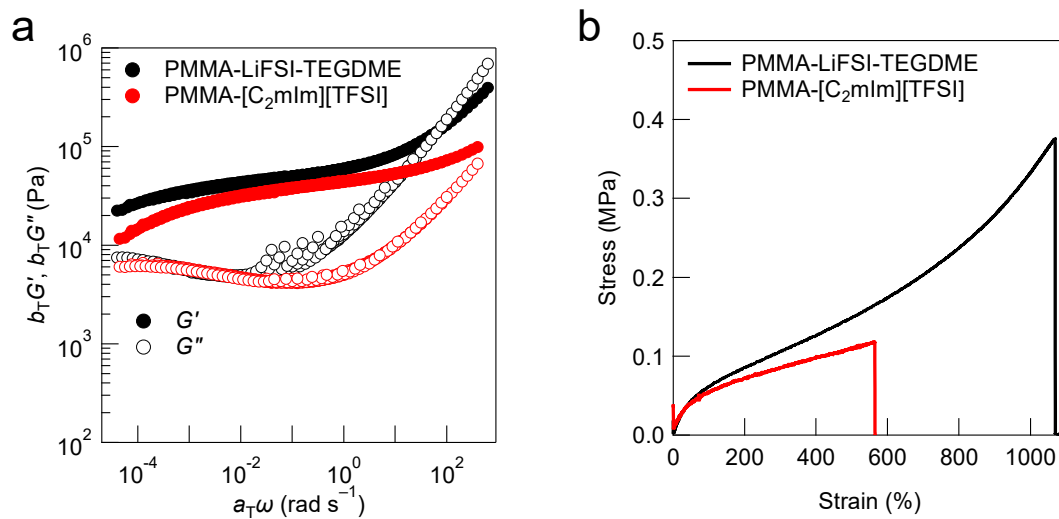

**Fig. S8.** Comparison of PMMA-LiFSI-TEGDME and PMMA-[C<sub>2</sub>mIm][TFSI] UHMW

gels in (a) viscoelastic master curves and (b) stress-strain behaviour.

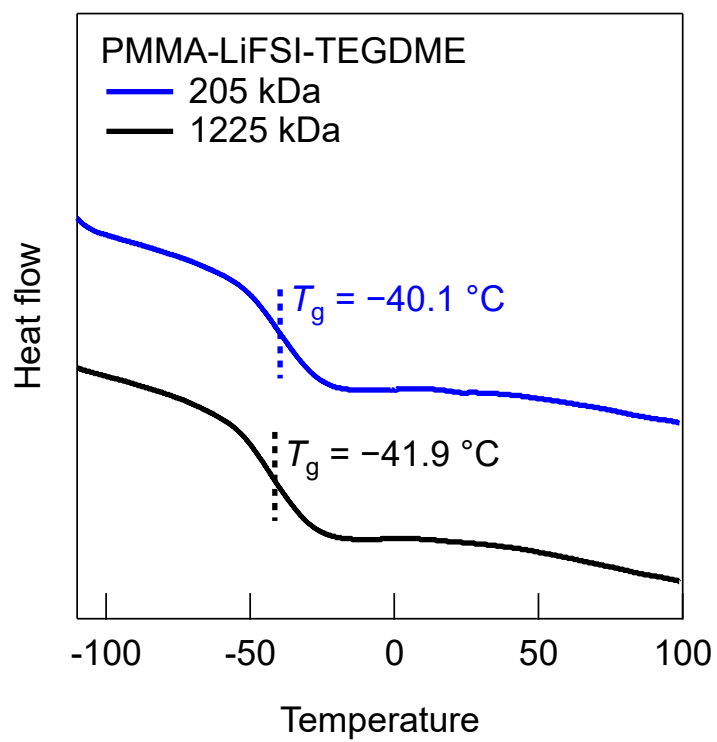

**Fig. S9.** DSC curves of PMMA-LiFSI-TEGDME systems with different molecular weights of PMMA.

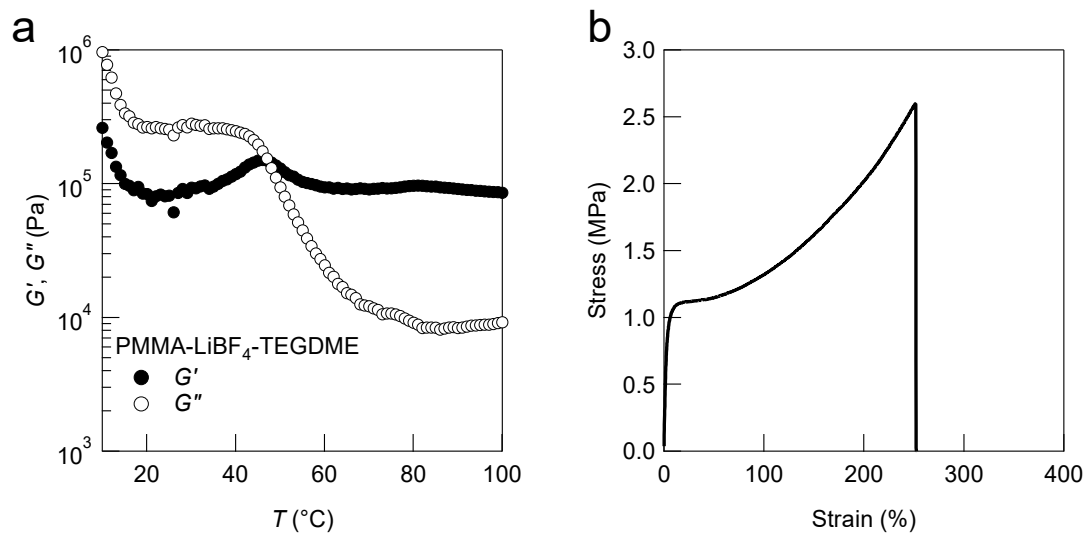

**Fig. S10.** (a) Temperature sweep measurement of the storage ( $G'$ ) and loss ( $G''$ ) moduli, and (b) stress-strain curve from the tensile test for the PMMA-LiBF<sub>4</sub>-TEGDME UHMW gel.

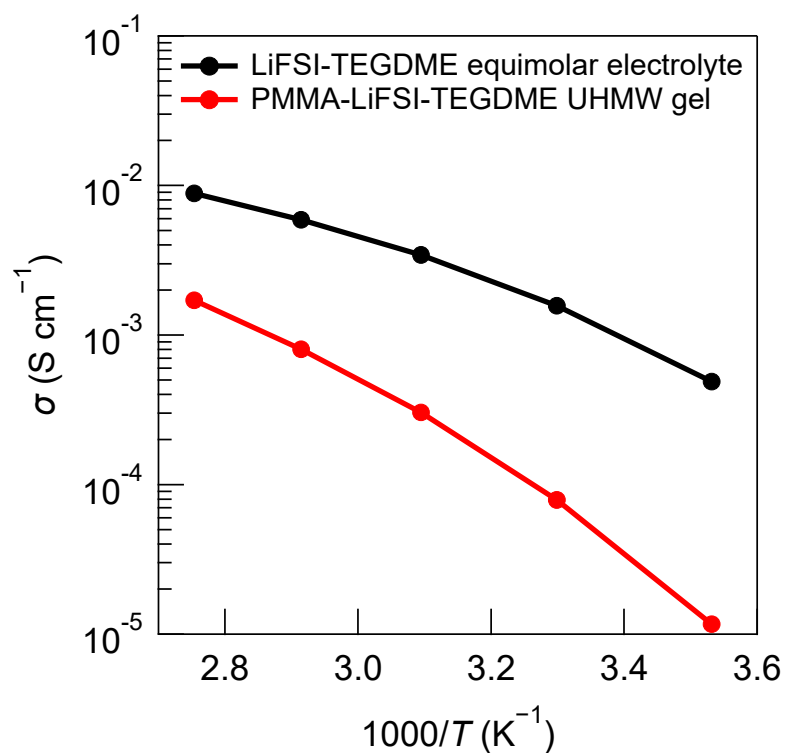

**Fig. S11.** Temperature dependence of ionic conductivity for the LiFSI-TEGDME equimolar mixture electrolyte and the corresponding PMMA-LiFSI-TEGDME UHMW gel.

**Table S2.** Ionic conductivity at 30 °C and lithium-ion transference number ( $t_{\text{Li}^+}$ ) at 25 °C for the LiFSI-TEGDME equimolar mixture electrolyte and the PMMA-LiFSI-TEGDME UHMW gel.

| electrolyte                    | Ionic conductivity (mS cm <sup>-1</sup> ) | $t_{\text{Li}^+}$  |
|--------------------------------|-------------------------------------------|--------------------|
| LiFSI-TEGDME equimolar mixture | 1.57                                      | 0.015 <sup>a</sup> |
| PMMA-LiFSI-TEGDME UHMW gel     | 0.08                                      | 0.2                |

<sup>a</sup>The value obtained from ref. S1

The  $t_{\text{Li}^+}$  was calculated by constructing a symmetrical cell using Li electrodes and combining DC polarisation and AC impedance measurements using a VMP3 potentiostat/galvanostat (Bio-Logic Science Instruments, France).<sup>S2</sup> Electrochemical impedance spectroscopy measurements were performed with an amplitude of 10 mV and a frequency range of 100 mHz to 1 MHz, both before and after DC polarisation at 10 mV for 1 h. From the results obtained, the  $t_{\text{Li}^+}$  was calculated using the following equation:

$$t_{\text{Li}^+} = \frac{I_{\text{SS}}(\Delta v - I_0 R_0)}{I_0(\Delta v - I_{\text{SS}} R_{\text{SS}})}$$

where  $\Delta v$  stands for the polarisation voltage,  $I_0$  is the initial current,  $I_{\text{SS}}$  is the steady-state current during the DC polarisation process, and  $R_0$  and  $R_{\text{SS}}$  are the charge transfer resistances before and after polarisation, respectively.

It should be noted that the  $t_{\text{Li}^+}$  of the PMMA-LiFSI-TEGDME UHMW gel is higher than that of the neat LiFSI-TEGDME equimolar mixture. This could be attributed to the interaction of the imide anion with PMMA,<sup>S3</sup> which may restrict the transport of anions, resulting in a higher  $t_{\text{Li}^+}$ .

## Supporting references

- S1. S. Pfeifer, F. Ackermann, F. Sälzer, M. Schönhoff and B. Røling, *Phys. Chem. Chem. Phys.*, 2021, **23**, 628-640.
- S2. J. Evans, C. A. Vincent, P. G. Bruce, *Polymer* 1987, **28**, 2324-2328.
- S3. M. A. Susan, T. Kaneko, A. Noda and M. Watanabe, *J. Am. Chem. Soc.*, 2005, **127**, 4976-4983.
